# Supplementary material for: Protocol of the Long-COVID Patients Causal Diagnosis and Rehabilitation Randomized Feasibility Controlled Trial in Patients with Dysautonomia: The LoCoDiRe-Dys Study
Source: MDPI journal article supplement (doi:10.3390/biomed3030026), 2023-06-26
Supplement: s1 [file s1]

Archive with 1 entries (1 files):
- biomed-2421692-supplementary.pdf
